# Supplementary material
Source: MDPI journal article supplement (https://www.mdpi.com/2079-6439/10/8/66)
Supplement: s1 [file s1 › fibers-1764811-supplementary.pdf]

**Supplementary Data****Tables****Table S1:** Thermal analysis under flowing air for cotton samples with and without 200 W/m<sup>2</sup>.min MLSE UV laser/plasma treatment.

| <b>Sample</b>                       | <b>T<sub>10%</sub>, °C</b> | <b>DTG<br/>Peak 1,<br/>°C</b> | <b>DTG<br/>Peak 2,<br/>°C</b> | <b>DTA<br/>Peak 1,<br/>°C</b> | <b>DTA<br/>Peak 2,<br/>°C</b> | <b>Residue at<br/>400 °C, %</b> |
|-------------------------------------|----------------------------|-------------------------------|-------------------------------|-------------------------------|-------------------------------|---------------------------------|
| Cot (Cotton)                        | 290                        | 339                           | 461                           | 348                           | 465                           | 21.0 ± 0.3                      |
| Cot/N <sub>2</sub>                  | 287                        | 338                           | 464                           | 349                           | 467                           | 18.2 ± 1.8                      |
| Cot/N <sub>2</sub> /CO <sub>2</sub> | 286                        | 337                           | 463                           | 346                           | 466                           | 19.3 ± 1.6                      |
| Cot/N <sub>2</sub> /O <sub>2</sub>  | 286                        | 337                           | 456                           | 345                           | 459                           | 19.3 ± 0.1                      |
| Cot/Ar                              | 278                        | 336                           | 458                           | 345                           | 460                           | 19.0 ± 0.1                      |
| Cot/Ar/CO <sub>2</sub>              | 281                        | 339                           | 453                           | 348                           | 468                           | 21.0 ± 1.0                      |
| Cot/Ar/CO <sub>2</sub><br>(no UV)   | 279                        | 335                           | 452                           | 345                           | 466                           | 18.0 ± 1.0                      |

**Table S2:** Thermal analysis results for PET samples after 200 W/m<sup>2</sup>.min plasma treatment with different plasma gases

| Sample                                      | T <sub>5%</sub> , °C | DTG Peak 1,<br>°C | DTG Peak<br>2, °C | Residue % at<br>500 °C |
|---------------------------------------------|----------------------|-------------------|-------------------|------------------------|
| PET                                         | 369                  | 431               | 537               | 14.0±1.0               |
| PET-Ar                                      | 360                  | 431               | 543               | 13.0±1.0               |
| PET-Ar/CO <sub>2</sub>                      | 358                  | 434               | 545               | 14.0±1.0               |
| PET-Ar/CO <sub>2</sub> (no UV)              | 354                  | 430               | 542               | 16.0±1.0               |
| PET-N <sub>2</sub> /CO <sub>2</sub>         | 357                  | 438               | 541               | 12.0±1.0               |
| PET-N <sub>2</sub> /CO <sub>2</sub> (no UV) | 360                  | 433               | 546               | 14.0±1.0               |

## Figures

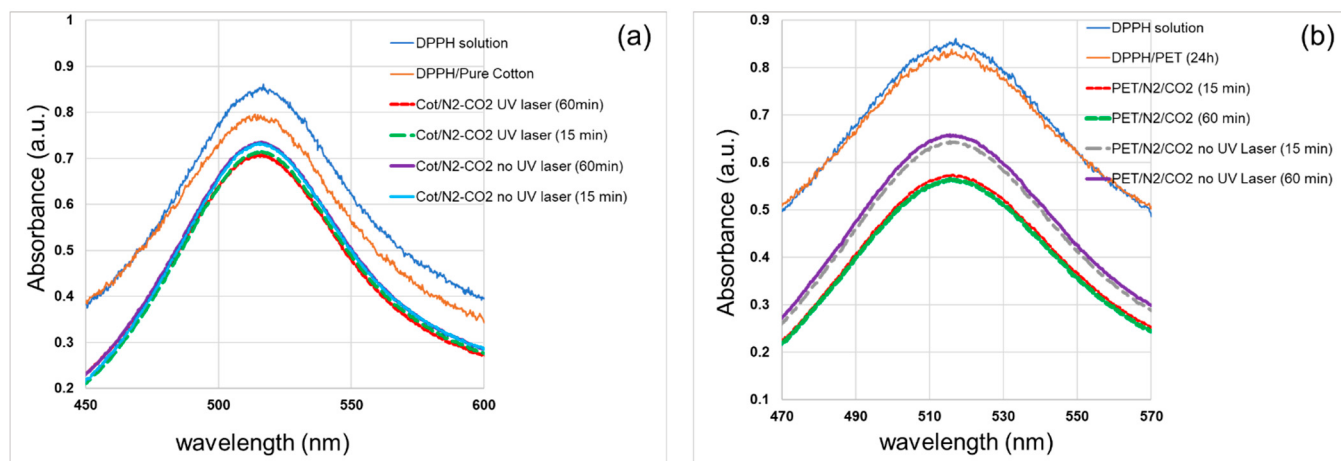

**Figure S1:** UV-Visible spectra for supernatant DPPH solution/exposed (a) cotton and (b) PET samples after 200 W/m<sup>2</sup>.min MLSE treatment under N<sub>2</sub>/CO<sub>2</sub> with and without UV laser. Note that the times in brackets refer to DPPH/fabric immersion times.

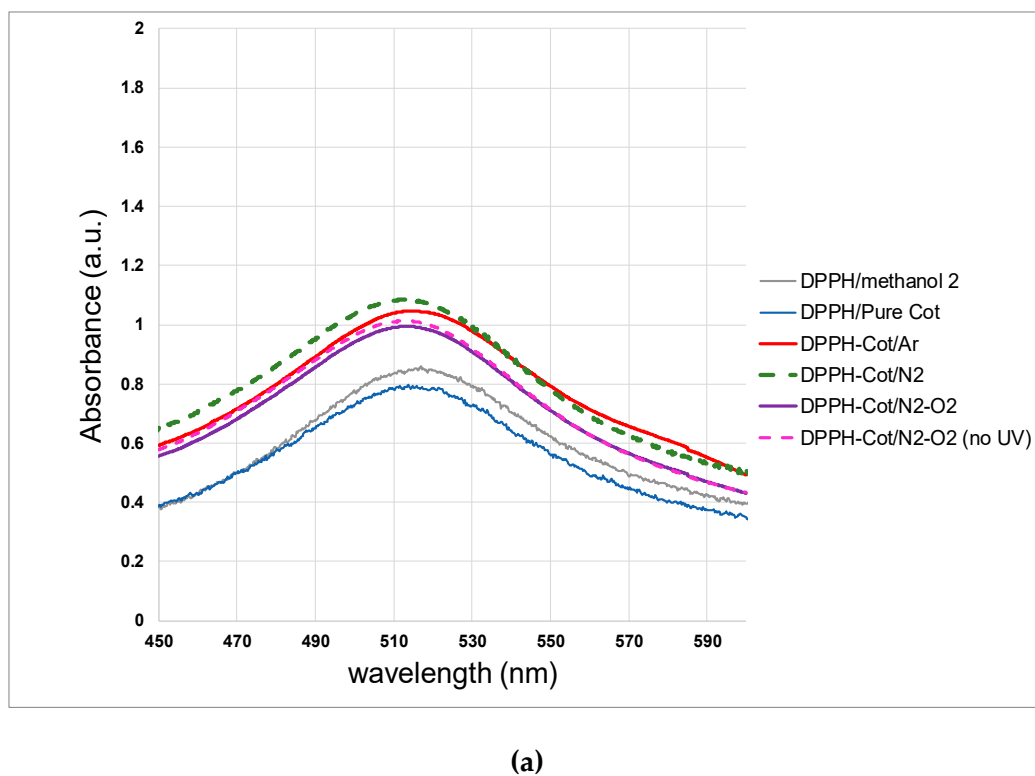

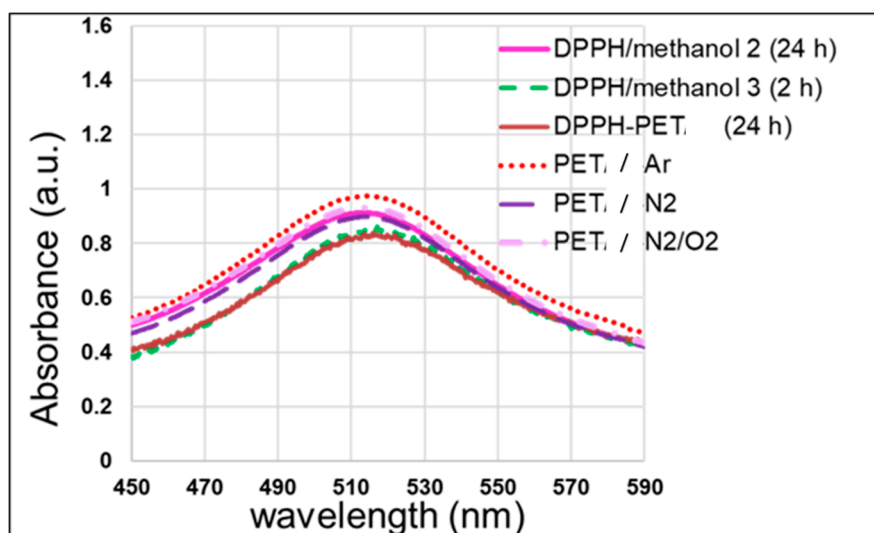

(b)

**Figure S2:** UV-Visible spectra for supernatant DPPH solutions from (a) cotton and (b) PET samples subjected to 3500 W/m<sup>2</sup>.min (as 3.5 kW) MLSE treatment under Ar, N<sub>2</sub> and N<sub>2</sub>/O<sub>2</sub> with UV laser, after 24 h immersion.

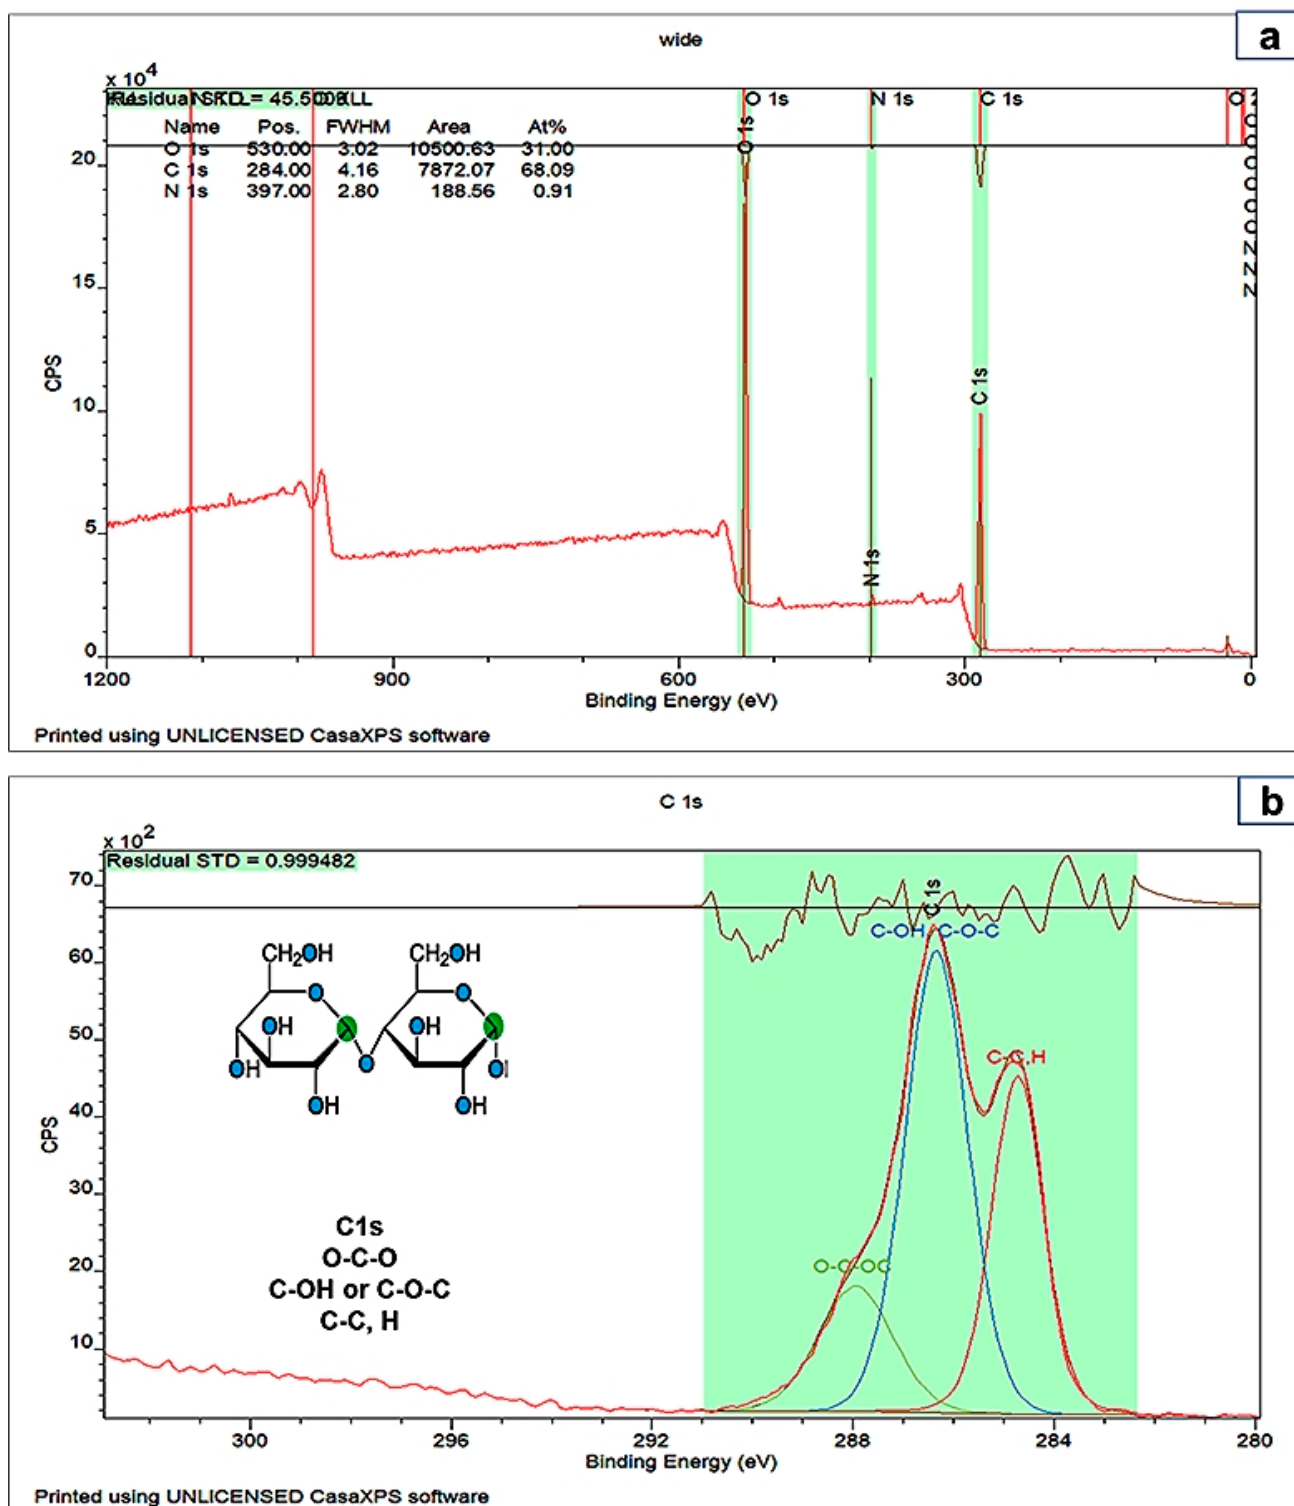

**Figure S3:** XPS spectra of the pure cotton fabric. a) full XPS spectrum, b) C1s high resolution spectrum. The peaks are curve fitted and deconvoluted using CasaXPS software to calculate the relative concentrations and different types of chemical bonds of the samples.

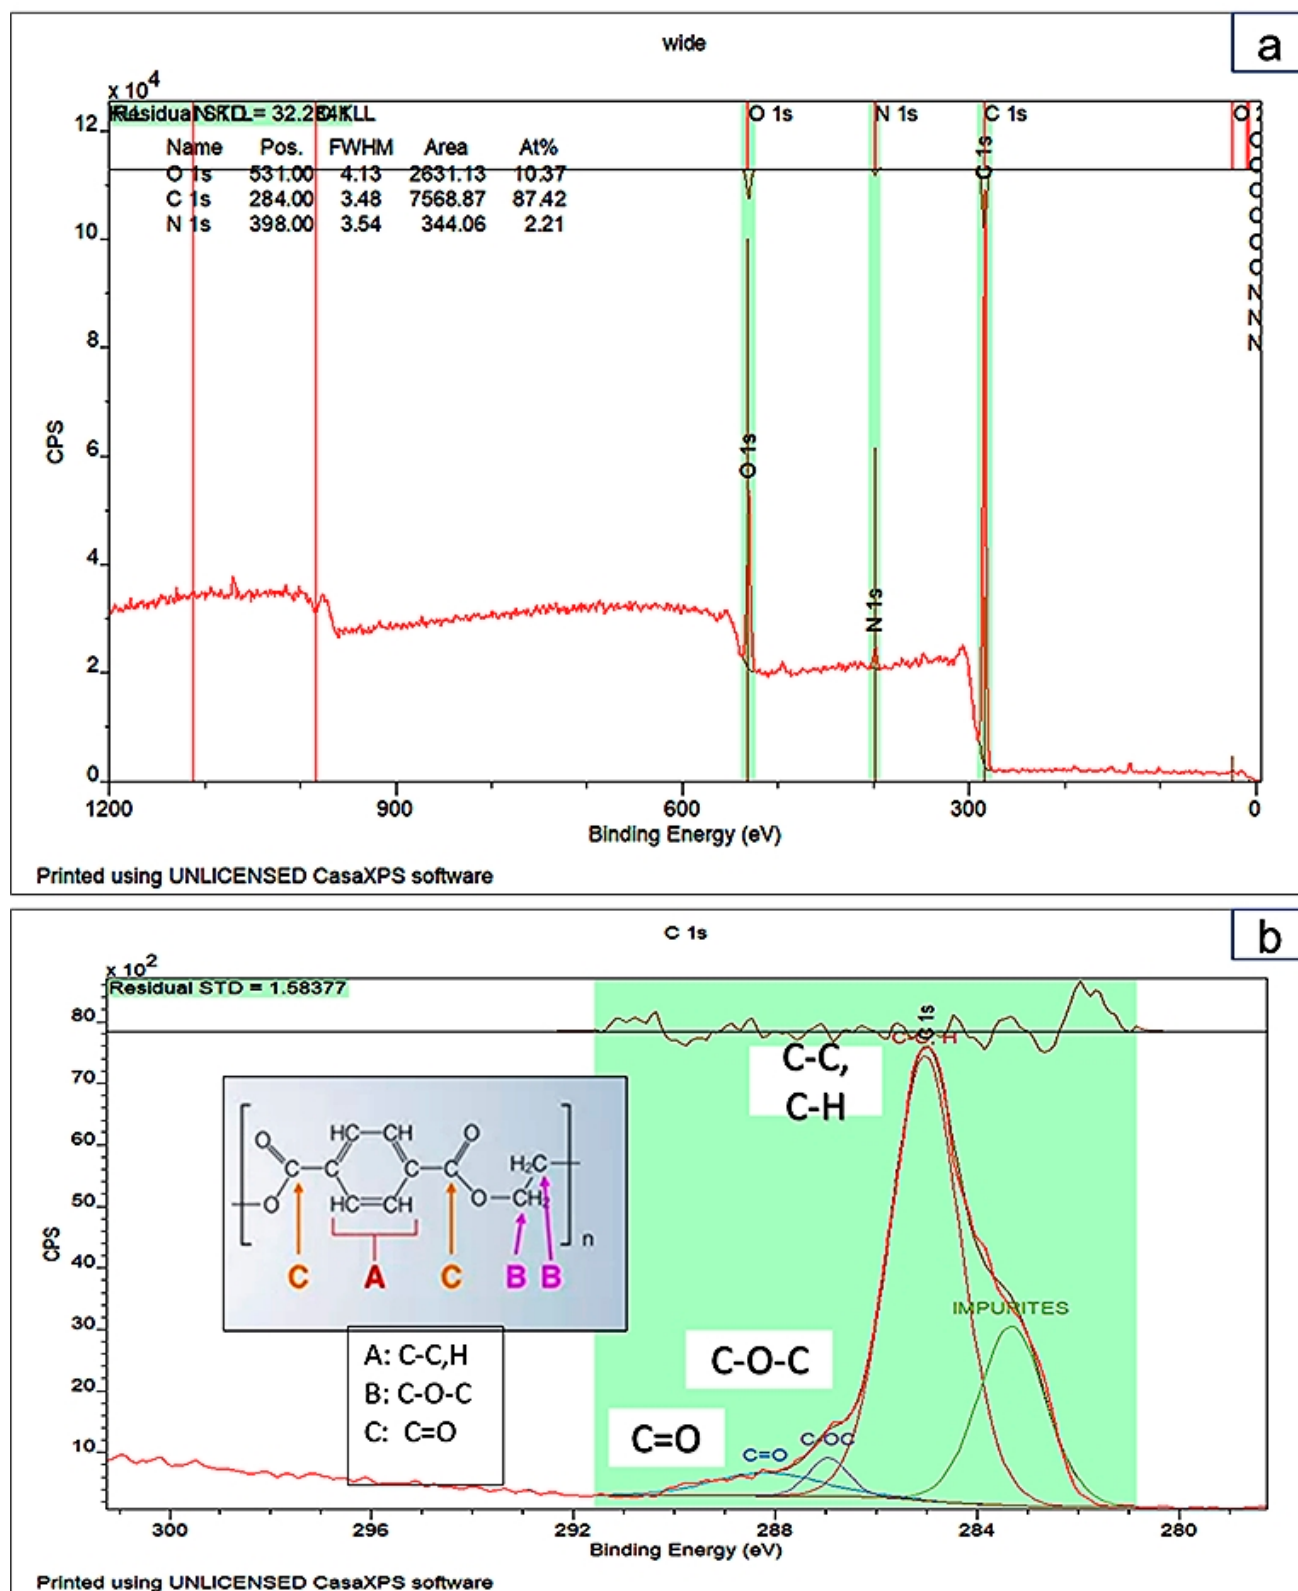

**Figure S4:** XPS spectra of the pure polyester (PET) fabric, a) Full spectrum, b) C1s high resolution spectrum. The peaks are curve fitted and deconvoluted using CasaXPS software to calculate the relative concentrations of the different types of carbon-containing chemical bonds in the samples.

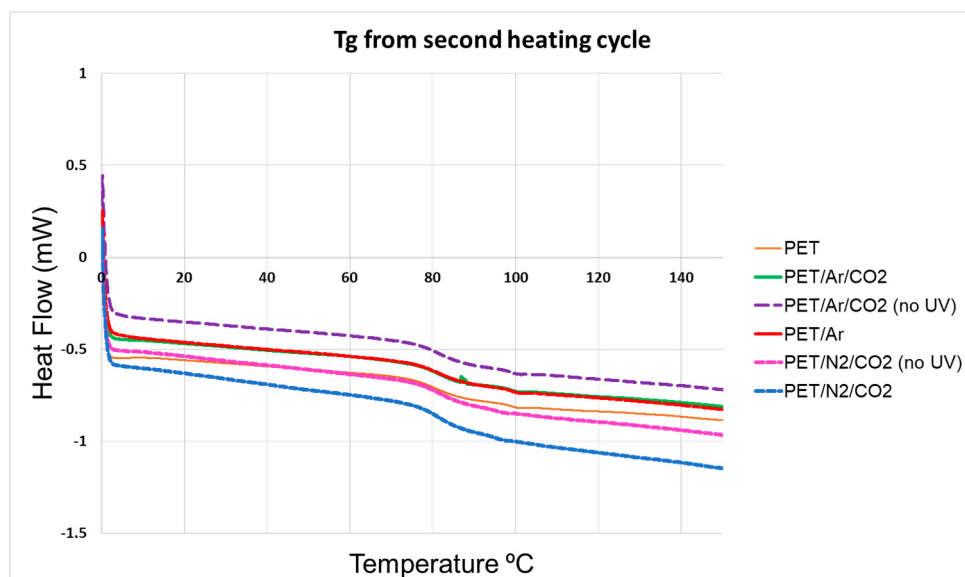

**Figure S5:** DSC traces during the second heating cycle showing glass transition ( $T_g$ ) of PET with and without 200 W/m<sup>2</sup>.min plasma treatments

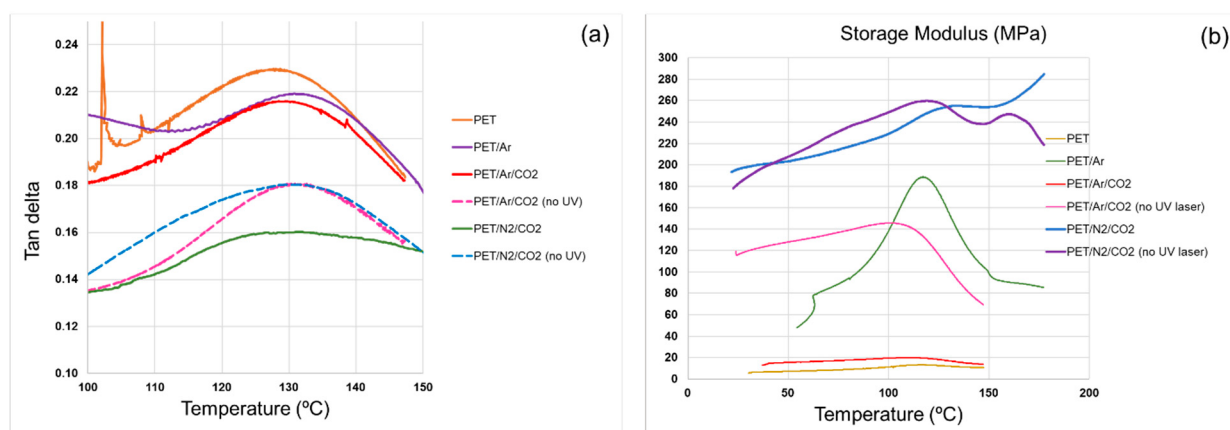

**Figure S6:** DMA analysis for PET before and after 200 W/m<sup>2</sup>.min plasma treatments: a) Tan delta, b) Storage Modulus vs Temp curves
